# Supplementary material for: Tunable colloidal quantum dot distributed feedback lasers integrated on a continuously chirped surface grating
Source: Royal Society of Chemistry journal article supplement (doi:10.1039/c8nr07854h), 2018-01-01
Supplement: c8nr07854h1.pdf [file c8nr07854h1.pdf]

## Electronic Supplementary Information

### Continuously Tunable Colloidal Quantum Dot Distributed Feedback Lasers Integrated on Chirped Surface Grating

Hyunho Jung, Changhyun Han, Hanbit Kim, Kyung-Sang Cho, Young-Geun Roh, Yeonsang Park,\* and Heonsu Jeon\*

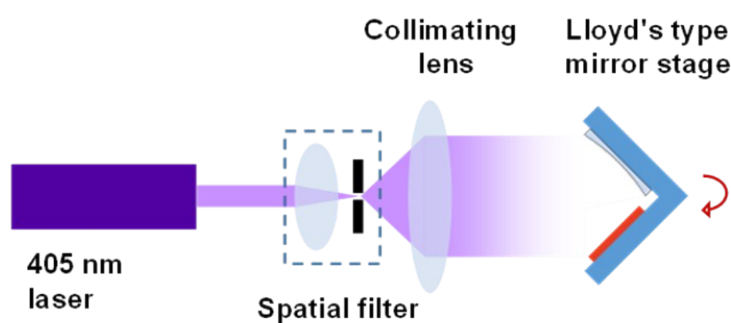

**Figure S1.** Laser interference lithography setup modified for fabricating period-chirped gratings.

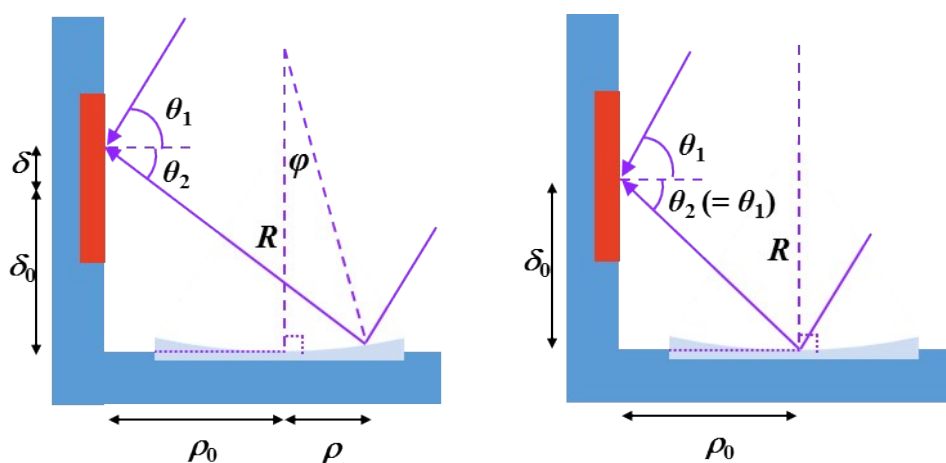

**Figure S2.** Schematic illustration of light paths in modified Lloyd's mirror geometry.

By using the notation in Figure S2, the following equations can be derived:

$$\Lambda(\varphi) = \frac{\lambda}{\sin \theta_1 + \sin \theta_2} = \frac{\lambda}{\sin \theta_1 + \sin(\theta_1 - 2\varphi)}$$

$$\rho = R \sin \varphi$$

$$\delta_0 = \rho_0 \tan \theta_1$$

$$\tan(\theta_1 - 2\varphi) = \frac{\delta + \delta_0 - R + \sqrt{R^2 - \rho^2}}{\rho + \rho_0}$$

$$\delta(\varphi) = (R \sin \varphi + \rho_0) \tan(\theta_1 - 2\varphi) - \rho_0 \tan \theta_1 + R(1 - \cos \varphi)$$

These coupled equations provide the information on the relationship between the grating period  $\Lambda$  and the position  $\delta$ .

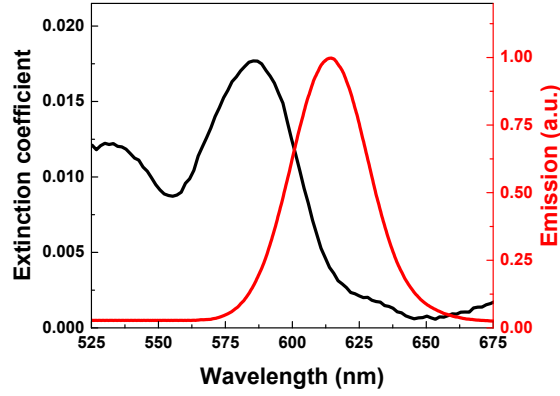

**Figure S3.** Absorption (black) and emission (red) spectra obtained from a thin film of the CdSe/CdS/ZnS CQDs.

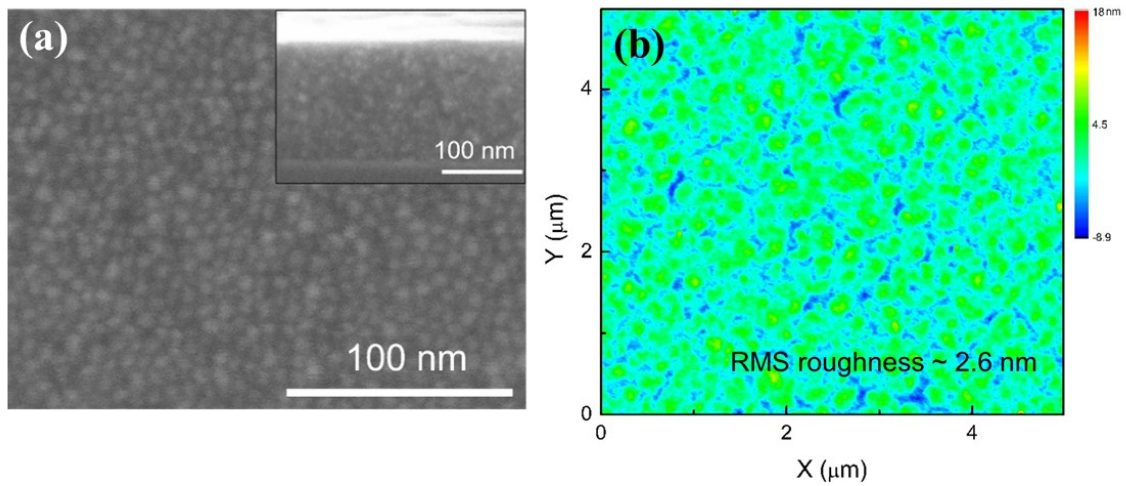

**Figure S4.** Top surface images of a wet-transferred CQD film from (a) SEM and (b) AFM. The inset in (a) is a cross-sectional image of the CQD film.

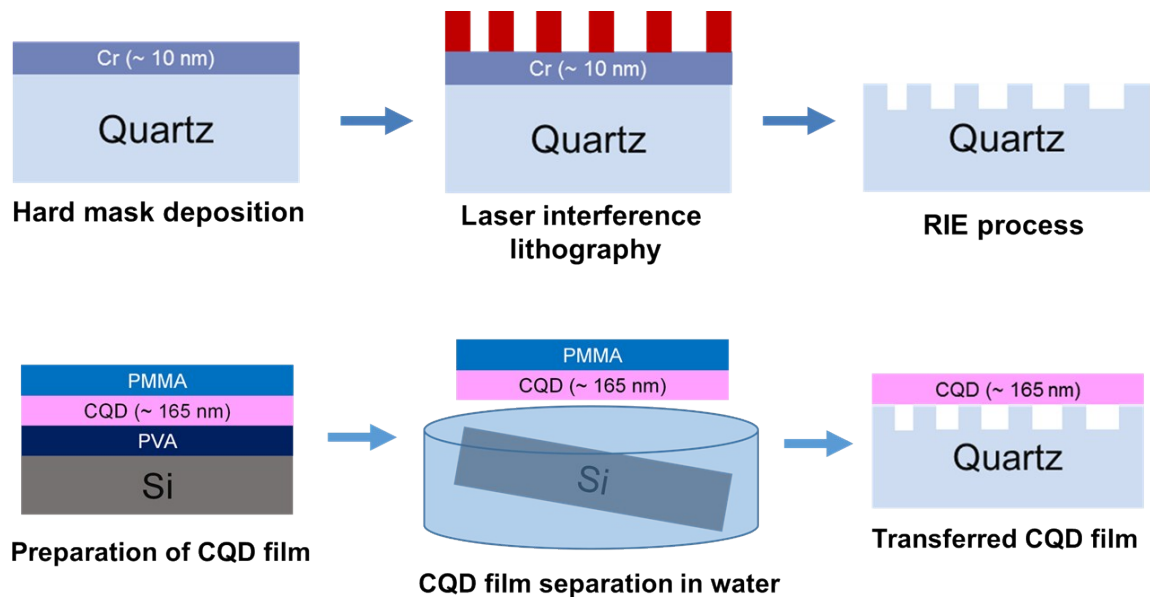

**Figure S5.** Flow chart of the CQD DFB device fabrication.

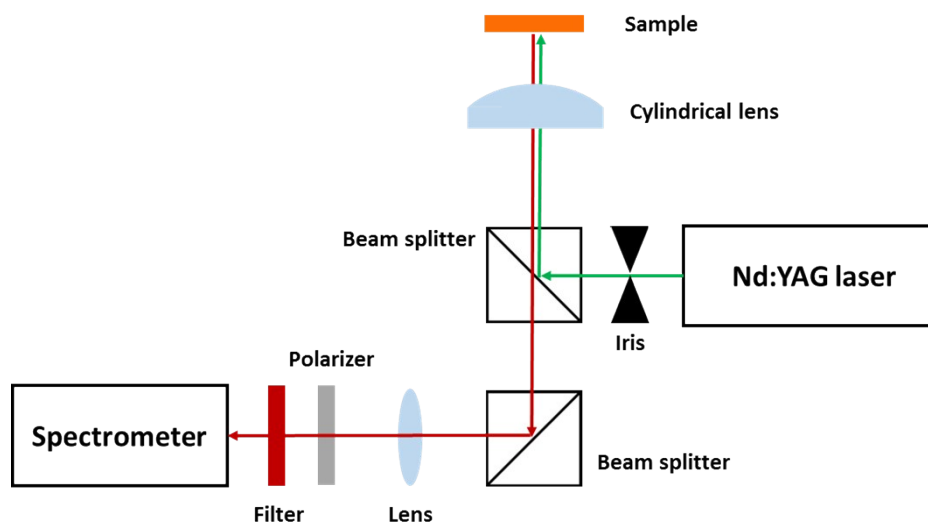

**Figure S6.** Schematic of the photoluminescence measurement setup.
